# Supplementary material for: Applications of genetic-epigenetic tissue mapping for plasma DNA in prenatal testing, transplantation and oncology
Source: eLife. 2021 Mar 23;10:e64356. doi: 10.7554/eLife.64356 (PMC7997656; doi:10.7554/eLife.64356)
Supplement: Supplementary file 1. [file elife-64356-supp1.xlsx]

## Sheet: Sheet1
Pregnancy model
sample ID	sample type	sequencing type	uniquely mapped reads	maternal-specific SNPs (M/F=AB/AA)	fetal-specific SNPs (M/F=AA/AB)	plasma BS sequencing fragments carrying maternal-specific SNPs	plasma BS sequencing fragments carrying fetal-specific SNPs	CpG sites on molecules carrying maternal-sepcific alleles	CpG sites on molecules carrying fetal-sepcific alleles	maternal CpG sites used for deconvolution (passed the CV and difference criteria)	fetal CpG sites used for deconvolution (passed the CV and difference criteria)
M11518	maternal plasma	whole-genome bisulfite sequencing	115939334	190707	194222	302360	48200	231789	53199	56677	13383
M11537	maternal plasma	whole-genome bisulfite sequencing	115860114	183137	192192	172183	37234	159743	41546	39443	10161
M11549	maternal plasma	whole-genome bisulfite sequencing	116164587	191381	191263	171764	33109	160412	37525	39496	9476
M11570	maternal plasma	whole-genome bisulfite sequencing	67029452	190744	192045	294523	48667	231915	53289	57111	12862
M11653	maternal plasma	whole-genome bisulfite sequencing	70658484	184875	196374	129622	35197	104540	33023	25117	8117
M11701	maternal plasma	whole-genome bisulfite sequencing	56639794	189640	189742	111721	58093	112010	62024	27724	15439
M11714	maternal plasma	whole-genome bisulfite sequencing	73286374	188935	189777	300445	48789	233514	53302	56930	13335
M11752	maternal plasma	whole-genome bisulfite sequencing	105450380	180719	198288	228705	31670	185812	33691	45573	8391
M11758	maternal plasma	whole-genome bisulfite sequencing	71155869	191712	195189	167594	48482	157377	52879	38838	13090
M11766	maternal plasma	whole-genome bisulfite sequencing	89522802	192157	194455	210697	20951	173303	22436	41982	5724
M11797	maternal plasma	whole-genome bisulfite sequencing	65389224	190084	192965	167183	30568	157782	34637	38565	8781
M11805	maternal plasma	whole-genome bisulfite sequencing	105380449	191303	194590	264354	52982	215507	56694	52740	14090
M11842	maternal plasma	whole-genome bisulfite sequencing	133166670	149309	195528	217169	32362	160823	30865	40609	7852
M11869	maternal plasma	whole-genome bisulfite sequencing	62333679	14035	145743	8067	16903	8237	16796	1997	4260
M11882	maternal plasma	whole-genome bisulfite sequencing	102395965	172287	194912	206458	17340	161780	17284	40228	4282
M11883	maternal plasma	whole-genome bisulfite sequencing	63340770	191953	194114	167733	25650	163846	30242	40861	7552
M11909	maternal plasma	whole-genome bisulfite sequencing	83788511	190107	192794	184108	33082	152940	34184	37525	8615
M11910	maternal plasma	whole-genome bisulfite sequencing	126815444	190290	197334	281152	107868	234574	109686	57595	27234
M11911	maternal plasma	whole-genome bisulfite sequencing	118923309	192998	193969	222978	146038	197724	138284	48662	34431
M11912	maternal plasma	whole-genome bisulfite sequencing	119380234	190317	190516	288836	76521	235416	81589	58227	20280
M11915	maternal plasma	whole-genome bisulfite sequencing	105459104	189598	194137	213504	107260	186608	105633	46069	26552
M11918	maternal plasma	whole-genome bisulfite sequencing	122357946	190147	192389	231105	136670	204255	132030	50324	32726
M11973	maternal plasma	whole-genome bisulfite sequencing	110671413	182462	197603	208402	93791	189549	95790	47645	23861
M11976	maternal plasma	whole-genome bisulfite sequencing	103718687	183219	196412	140158	133341	133315	125217	33750	31344
M11987	maternal plasma	whole-genome bisulfite sequencing	55097973	175381	197141	90565	19340	74318	17530	17905	4254
M11991	maternal plasma	whole-genome bisulfite sequencing	114376060	184872	201847	189340	117603	174878	115443	43512	28806
M11993	maternal plasma	whole-genome bisulfite sequencing	186046109	190107	197915	409663	120658	295671	122253	73027	31152
M11999	maternal plasma	whole-genome bisulfite sequencing	92713120	189459	194503	162010	95725	156240	99914	39225	25159
M12041	maternal plasma	whole-genome bisulfite sequencing	76798932	192193	195009	167319	34710	145012	36486	35334	9277
M12092	maternal plasma	whole-genome bisulfite sequencing	52544057	180844	196896	89532	20894	73560	19281	17809	4712
Lung transplantation model
sample ID	sample type	sequencing type	uniquely mapped reads	donor-specific SNPs (D/R=AB/AA)	recipient-specific SNPs (D/R=AA/AB)	SNPs specific for both the donor and recipient (D/R=AA/BB)	plasma BS sequencing fragments carrying donor-specific SNPs	plasma BS sequencing fragments carrying recipient-specific SNPs	CpG sites on molecules carrying donor-sepcific alleles	CpG sites on molecules carrying recipient-sepcific alleles	donor CpG sites used for deconvolution (passed the CV and difference criteria)	recipient CpG sites used for deconvolution (passed the CV and difference criteria)
LTP1_72hr	recipient plamsa	whole-genome bisulfite sequencing	38905674	299493	313157	81687	49074	186146	58010	141334	14057	32379
LTP2_72hr	recipient plamsa	whole-genome bisulfite sequencing	428043984	264804	270285	80890	254900	2282206	267146	840835	67588	202181
LTP3_72hr	recipient plamsa	whole-genome bisulfite sequencing	32337808	276089	270605	82872	317052	182791	306163	141065	74634	34065
LTP4_72hr	recipient plamsa	whole-genome bisulfite sequencing	307518063	273848	268233	89733	9610	1920948	12700	916505	2991	220061
LTP4_6dy	recipient plamsa	whole-genome bisulfite sequencing	270463991	273848	268233	89733	22439	1911744	24091	942966	5549	226329
LTP5_72hr	recipient plamsa	whole-genome bisulfite sequencing	193821248	344024	279215	111772	434708	1291680	425866	849031	104115	208950
LTP5_7dy	recipient plamsa	whole-genome bisulfite sequencing	211985666	344024	279215	111772	135056	1710670	154687	865533	38799	210436
LTP6_72hr	recipient plamsa	whole-genome bisulfite sequencing	390971590	259352	261529	77838	20856	2297241	23184	834919	5591	201830
LTP6_4wk	recipient plamsa	whole-genome bisulfite sequencing	230026006	259352	261529	77838	107901	1628414	132293	815885	32668	196684
LTP7_72hr	recipient plamsa	whole-genome bisulfite sequencing	282021064	270144	331828	105172	265474	2110848	272327	935988	67446	227265
LTP7_7dy	recipient plamsa	whole-genome bisulfite sequencing	431525264	270144	331828	105172	140322	3515938	152168	1071021	37732	258587
LTP7_5wk	recipient plamsa	whole-genome bisulfite sequencing	296683766	270144	331828	105172	121391	2665340	152475	1129510	38860	274128
LTP7_20wk	recipient plamsa	whole-genome bisulfite sequencing	268849950	270144	331828	105172	28815	2472861	36382	1074393	8974	260718
LTP7_25wk	recipient plamsa	whole-genome bisulfite sequencing	273421846	270144	331828	105172	128100	2408897	173064	1132885	42279	273374
LTP7_157wk	recipient plamsa	whole-genome bisulfite sequencing	386172235	270144	331828	105172	148133	3395771	174798	1194034	42656	285784
LTP8_72hr	recipient plamsa	whole-genome bisulfite sequencing	325046955	265465	267868	81957	428427	1944571	394848	808611	97186	192851
LTP8_7dy	recipient plamsa	whole-genome bisulfite sequencing	258228888	265465	267868	81957	33638	1825579	31655	837256	7547	201699
LTP8_8wk	recipient plamsa	whole-genome bisulfite sequencing	361728953	265465	267868	81957	192012	2622129	239977	914563	59585	218784
LTP8_38wk	recipient plamsa	whole-genome bisulfite sequencing	383085492	265465	267868	81957	22542	2819285	24574	1006957	5685	241646
LTP8_77wk	recipient plamsa	whole-genome bisulfite sequencing	300927159	265465	267868	81957	67489	2025692	81491	876363	19865	210560
LTP8_129wk	recipient plamsa	whole-genome bisulfite sequencing	369113810	265465	267868	81957	62047	2592021	74249	925154	18123	220279
LTP9_72hr	recipient plamsa	whole-genome bisulfite sequencing	429417294	261295	357009	133422	39778	3441651	35168	1148640	8055	277409
LTP9_7dy	recipient plamsa	whole-genome bisulfite sequencing	347985315	261295	357009	133422	752133	3338532	529211	1329292	128978	318556
LTP9_6wk	recipient plamsa	whole-genome bisulfite sequencing	256200129	261295	357009	133422	40147	2681699	50634	1174013	12627	284292
LTP9_13wk	recipient plamsa	whole-genome bisulfite sequencing	314014132	261295	357009	133422	178284	3030536	200775	1132837	50369	273324
LTP9_22wk	recipient plamsa	whole-genome bisulfite sequencing	461547226	261295	357009	133422	88584	4532464	112383	1282475	28476	308225
LTP10_72hr	recipient plamsa	whole-genome bisulfite sequencing	409536505	254846	263958	77196	74391	2592313	88104	916150	21777	220844
LTP10_7dy	recipient plamsa	whole-genome bisulfite sequencing	422577706	254846	263958	77196	15005	2579644	15516	912559	3843	219871
LTP10_10dy	recipient plamsa	whole-genome bisulfite sequencing	329216465	254846	263958	77196	745598	2280441	526332	891312	129490	215014
LTP10_4wk	recipient plamsa	whole-genome bisulfite sequencing	193866375	254846	263958	77196	123649	1397080	151295	822952	38209	199278
LTP10_14wk	recipient plamsa	whole-genome bisulfite sequencing	477076416	254846	263958	77196	358293	3431745	380911	991412	94267	238045
LTP10_25wk	recipient plamsa	whole-genome bisulfite sequencing	480907278	254846	263958	77196	463964	3412821	518710	977628	131943	233953
LTP10_103wk	recipient plamsa	whole-genome bisulfite sequencing	425749924	254846	263958	77196	30363	2963823	36146	939015	9082	224413
LTP11_72hr	recipient plamsa	whole-genome bisulfite sequencing	326468687	275489	267304	79326	394058	1895713	349066	809164	85918	194187
LTP11_7dy	recipient plamsa	whole-genome bisulfite sequencing	298539808	275489	267304	79326	13379	2033954	18907	807046	4658	194345
LTP11_5wk	recipient plamsa	whole-genome bisulfite sequencing	472135939	275489	267304	79326	415015	3347043	369953	1013879	91633	241067
LTP11_15wk	recipient plamsa	whole-genome bisulfite sequencing	481062816	275489	267304	79326	12004	3491864	17799	1046791	4276	249193
LTP11_26wk	recipient plamsa	whole-genome bisulfite sequencing	220654585	275489	267304	79326	320050	1650907	308012	847235	75772	206527
LTP11_61wk	recipient plamsa	whole-genome bisulfite sequencing	469301072	275489	267304	79326	21438	3400029	28341	1001738	6894	238251
LTP11_104wk	recipient plamsa	whole-genome bisulfite sequencing	246601131	275489	267304	79326	31572	1823041	36260	901727	8991	217818
HCC model
tumor tissue vs buffy coat
sample ID	sample type	sequencing type	uniquely mapped reads	tumor-specific mutations	plasma BS sequencing fragments carrying tumor-specific mutations	plasma BS sequencing fragments carrying wildtype alleles	CpG sites on molecules carrying tumor-specific mutations	CpG sites on molecules carrying wildtype alleles	tumor-specific CpG sites used for deconvolution (passed the CV and difference criteria)	wildtype CpG sites used for deconvolution (passed the CV and difference criteria)
HCC1	tumor tissue	whole-genome non-bisulfite sequencing	1130168552	30383	29868	153238	18193	35883	4343	8445
	buffy coat	whole-genome non-bisulfite sequencing	1065173268
	plasma	whole-genome bisulfite sequencing	244959100
HCC2	tumor tissue	whole-genome non-bisulfite sequencing	1115517892	6996	5090	26792	4076	8156	999	1978
	buffy coat	whole-genome non-bisulfite sequencing	1099982015
	plasma	whole-genome bisulfite sequencing	187893638
plasma vs buffy coat
sample ID	sample type	sequencing type	uniquely mapped reads	tumor-specific mutations	plasma BS sequencing fragments carrying tumor-specific mutations	plasma BS sequencing fragments carrying wildtype alleles	CpG sites on molecules carrying tumor-specific mutations	CpG sites on molecules carrying wildtype alleles	tumor-specific CpG sites used for deconvolution (passed the CV and difference criteria)	wildtype CpG sites used for deconvolution (passed the CV and difference criteria)
HCC1	buffy coat	whole-genome non-bisulfite sequencing	1065173268	10864	16200	67713	12887	18332	2705	3861
	plasma	whole-genome non-bisulfite sequencing	995705558
	plasma	whole-genome bisulfite sequencing	244959100
HCC2	buffy coat	whole-genome non-bisulfite sequencing	1099982015	3446	4112	14752	2991	4420	722	966
	plasma	whole-genome non-bisulfite sequencing	1222877966
	plasma	whole-genome bisulfite sequencing	187893638
Pregnant woman with lymphoma
sample ID	sample type	sequencing type	uniquely mapped reads	tumor-specific mutations	fetal-specific SNPs	plasma BS sequencing fragments carrying tumor-specific mutations	plasma BS sequencing fragments carrying wildtype alleles	plasma BS sequencing fragments carrying fetal-specific alleles	plasma BS sequencing fragments carrying alleles shared by the mother and fetus	CpG sites on molecules carrying tumor-specific mutations	CpG sites on molecules carrying wildtype alleles	CpG sites on molecules carrying fetal-specific mutations	CpG sites on molecules carrying alleles shared by the mother and fetus	tumor-specific CpG sites used for deconvolution (passed the CV and difference criteria)	wildtype CpG sites used for deconvolution (passed the CV and difference criteria)	fetal-specific CpG sites used for deconvolution (passed the CV and difference criteria)	shared CpG sites used for deconvolution (passed the CV and difference criteria)
pregnant woman with lymphoma	cancer tissue (lymphoma, bone marrow trephine)	whole-genome non-bisulfite sequencing	533764131	2641	231552	14070	78171	240533	3218842	4781	6660	188961	412208	1106	1510	45267	99315
	normal tissue (buffy coat, buccal swab)	whole-genome non-bisulfite sequencing	454096615
	plasma	whole-genome non-bisulfite sequencing	2119275266
	plasma	whole-genome bisulfite sequencing	700915806
